# Supplementary material
Source: publisher site journal article supplement (https://www.spandidos-publications.com/1775/downloadSupplementary)
Supplement: Supplementary file 1 [file downloadSupplementary]

Figure S1. Three-year overall survival curve according to laryngeal preservation. Survival curve of patients after surgery for cervical esophageal squamous cell carcinoma according to laryngeal preservation (n=48). Data were analyzed using a log-rank test. \*P<0.05.

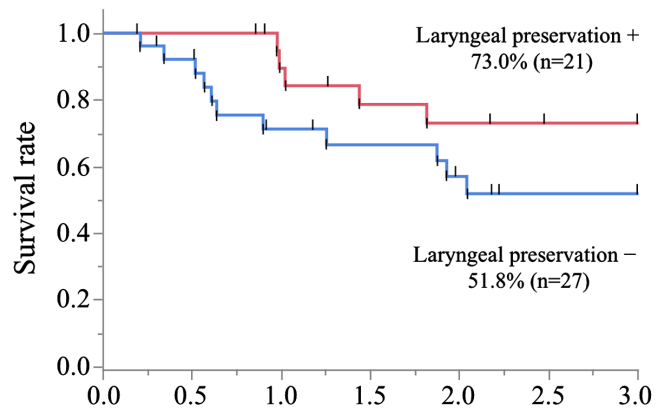

Figure S2. Three-year overall survival curve according to initial treatment. Survival curve of patients with cervical esophageal squamous cell carcinoma according to initial treatment (n=69). Data were analyzed using a log-rank test. \*P<0.05.

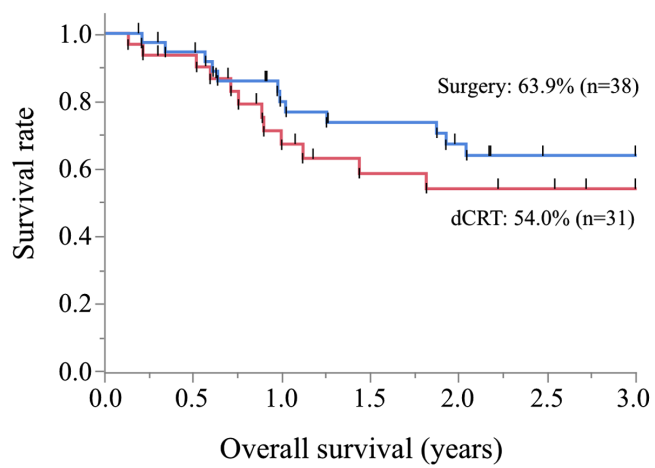

Figure S3. Three-year overall survival curve after CRT. Survival curve of patients after CRT for cervical esophageal squamous cell carcinoma (n=31). Data were analyzed using a log-rank test. \*P<0.05. CRT, chemoradiotherapy.

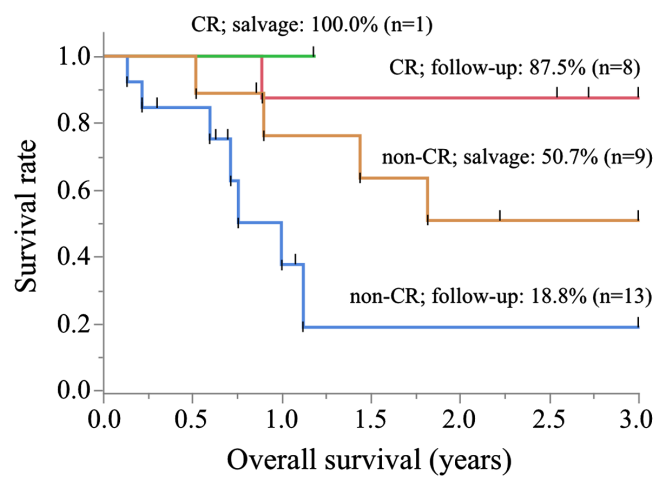

Table SI. Comparison between the two groups according to BMI in surgery cases (n=48).

| Variable               | Total, n | BMI, n |     | P-value            |
|------------------------|----------|--------|-----|--------------------|
|                        |          | ≥20    | <20 |                    |
| Age, years             |          |        |     | 0.771              |
| ≥65                    | 28       | 13     | 15  |                    |
| <65                    | 20       | 8      | 12  |                    |
| Sex                    |          |        |     | 0.510              |
| Male                   | 36       | 17     | 19  |                    |
| Female                 | 12       | 4      | 8   |                    |
| cT                     |          |        |     | 0.704              |
| T1                     | 6        | 3      | 3   |                    |
| T2-T3                  | 27       | 13     | 14  |                    |
| T4                     | 15       | 5      | 10  |                    |
| Tumor length, mm       |          |        |     | 0.032 <sup>a</sup> |
| ≥40                    | 22       | 6      | 16  |                    |
| <40                    | 26       | 15     | 11  |                    |
| cN                     |          |        |     | 0.536              |
| N0                     | 14       | 5      | 9   |                    |
| N1-N3                  | 34       | 16     | 18  |                    |
| cStage                 |          |        |     | 0.898              |
| cStage0-I              | 4        | 2      | 2   |                    |
| cStageII-III           | 11       | 4      | 7   |                    |
| cStageIV               | 33       | 15     | 18  |                    |
| NAT                    |          |        |     | 0.107              |
| Present                | 35       | 18     | 17  |                    |
| Absent                 | 13       | 3      | 10  |                    |
| Distance               |          |        |     | 0.018 <sup>a</sup> |
| Short group            | 30       | 9      | 21  |                    |
| Long group             | 18       | 12     | 6   |                    |
| Laryngeal preservation |          |        |     | 0.008 <sup>a</sup> |
| Present                | 21       | 14     | 7   |                    |
| Absent                 | 27       | 7      | 20  |                    |

<sup>a</sup>P<0.05. The data were analyzed using  $\chi^2$  test or Fisher's exact test. cT, clinical T; cN, clinical N; cStage, clinical Stage; NAT, neoadjuvant therapy; Short group, patients with distance from the cricoid cartilage ≥-5 mm; Long group, patients with distance from the cricoid cartilage <-5 mm.

Table SII. Patterns of recurrence in patients with cervical esophageal squamous cell carcinoma with or without laryngeal preservation.

| Patterns of recurrence | Total, n | Preservation - (n=27) | Preservation + (n=21) | P-value            |
|------------------------|----------|-----------------------|-----------------------|--------------------|
| Total recurrence       | 23       | 11                    | 12                    | 0.383              |
| Distant metastasis     | 9        | 8                     | 1                     | 0.031 <sup>a</sup> |
| Local recurrence       | 16       | 5                     | 11                    | 0.029 <sup>a</sup> |

<sup>a</sup>P<0.05 analyzed using  $\chi^2$  test or Fisher's exact test. Preservation, laryngeal preservation.

Table SIII. Patterns of recurrence in patients with cervical esophageal squamous cell carcinoma based on the distance from the cricoid cartilage.

| Patterns of recurrence | Total, n | Distance, n |            | P-value |
|------------------------|----------|-------------|------------|---------|
|                        |          | Short group | Long group |         |
| Total recurrence       | 23       | 14          | 9          | 1.000   |
| Distant metastasis     | 9        | 7           | 2          | 0.451   |
| Local recurrence       | 16       | 8           | 8          | 0.226   |

Short group, patients with distance from the cricoid cartilage  $\geq$ -5 mm; Long group, patients with distance from the cricoid cartilage  $<$ -5 mm.

Table SIV. Three-year overall survival rates of surgery cases with cervical esophageal squamous cell carcinoma (n=48).

| Variable               | Total, n | 3-year overall survival rate, % | Univariate analysis P-value | Multivariate analysis |            |                    |
|------------------------|----------|---------------------------------|-----------------------------|-----------------------|------------|--------------------|
|                        |          |                                 |                             | HR                    | 95% CI     | P-value            |
| Age, years             |          |                                 | 0.361                       |                       |            |                    |
| ≥65                    | 28       | 69.3                            |                             |                       |            |                    |
| <65                    | 20       | 53.6                            |                             |                       |            |                    |
| Sex                    |          |                                 | 0.220                       |                       |            |                    |
| Male                   | 36       | 55.0                            |                             |                       |            |                    |
| Female                 | 12       | 82.5                            |                             |                       |            |                    |
| BMI                    |          |                                 | 0.701                       |                       |            |                    |
| ≥20                    | 21       | 64.2                            |                             |                       |            |                    |
| <20                    | 27       | 59.7                            |                             |                       |            |                    |
| ASA-PS                 |          |                                 | 0.514                       |                       |            |                    |
| 1,2                    | 41       | 63.8                            |                             |                       |            |                    |
| 3,4                    | 7        | 50.0                            |                             |                       |            |                    |
| cT                     |          |                                 | 0.002 <sup>a</sup>          | 3.71                  | 1.36-10.53 | 0.011 <sup>b</sup> |
| T1-T3                  | 33       | 74.8                            |                             |                       |            |                    |
| T4                     | 15       | 32.8                            |                             |                       |            |                    |
| Tumor length, mm       |          |                                 | 0.919                       |                       |            |                    |
| ≥40                    | 22       | 64.8                            |                             |                       |            |                    |
| <40                    | 26       | 58.2                            |                             |                       |            |                    |
| cN                     |          |                                 | 0.772                       |                       |            |                    |
| N0                     | 14       | 68.8                            |                             |                       |            |                    |
| N1-N3                  | 34       | 59.2                            |                             |                       |            |                    |
| Distance               |          |                                 | 0.010 <sup>a</sup>          | 4.91                  | 1.35-31.47 | 0.013 <sup>b</sup> |
| Short group            | 30       | 45.8                            |                             |                       |            |                    |
| Long group             | 18       | 87.4                            |                             |                       |            |                    |
| Laryngeal preservation |          |                                 | 0.120                       |                       |            |                    |
| Present                | 21       | 73.0                            |                             |                       |            |                    |
| Absent                 | 27       | 51.8                            |                             |                       |            |                    |
| Resection              |          |                                 | 0.542                       |                       |            |                    |
| R0                     | 32       | 65.4                            |                             |                       |            |                    |
| R1,R2                  | 16       | 54.0                            |                             |                       |            |                    |
| Initial treatment      |          |                                 | 0.618                       |                       |            |                    |
| dCRT                   | 10       | 52.5                            |                             |                       |            |                    |
| Surgery                | 38       | 63.9                            |                             |                       |            |                    |

<sup>a</sup>P<0.05 using the log-rank test; <sup>b</sup>P<0.05 using Cox hazard regression analysis. BMI, Body mass index; ASA-PS, American Society of Anesthesiologists' Physical Status; cT, clinical T; cN, clinical N; Distance, distance between the cricoid cartilage and upper tumor edge; Short group, patients with distance from the cricoid cartilage ≥-5 mm; Long group, patients with distance from the cricoid cartilage <-5 mm; dCRT, definitive chemoradiotherapy; HR, hazard ratio.
